# Supplementary material
Source: PubMed Central journal article supplement (PMC5887163)

## Supplementary Figure 1

**Supplementary Figure 1A-E: SPOP mRNA expression is frequently down-regulated in human prostate cancer.** Box-and-whisker plots of SPOP mRNA expression levels in five different publicly available prostate cancer datasets (normal/benign, primary cancer and, where available, metastatic cancer). The findings in Panel B were previously reported in Barbieri et al. 2012 *Nature Genetics* study and are included here for comparison.

\*p-value<0.001. Black asterisks indicate comparison of normal/benign group against primary and red asterisks indicate comparison of primary group with metastases or CRPC (as applicable).

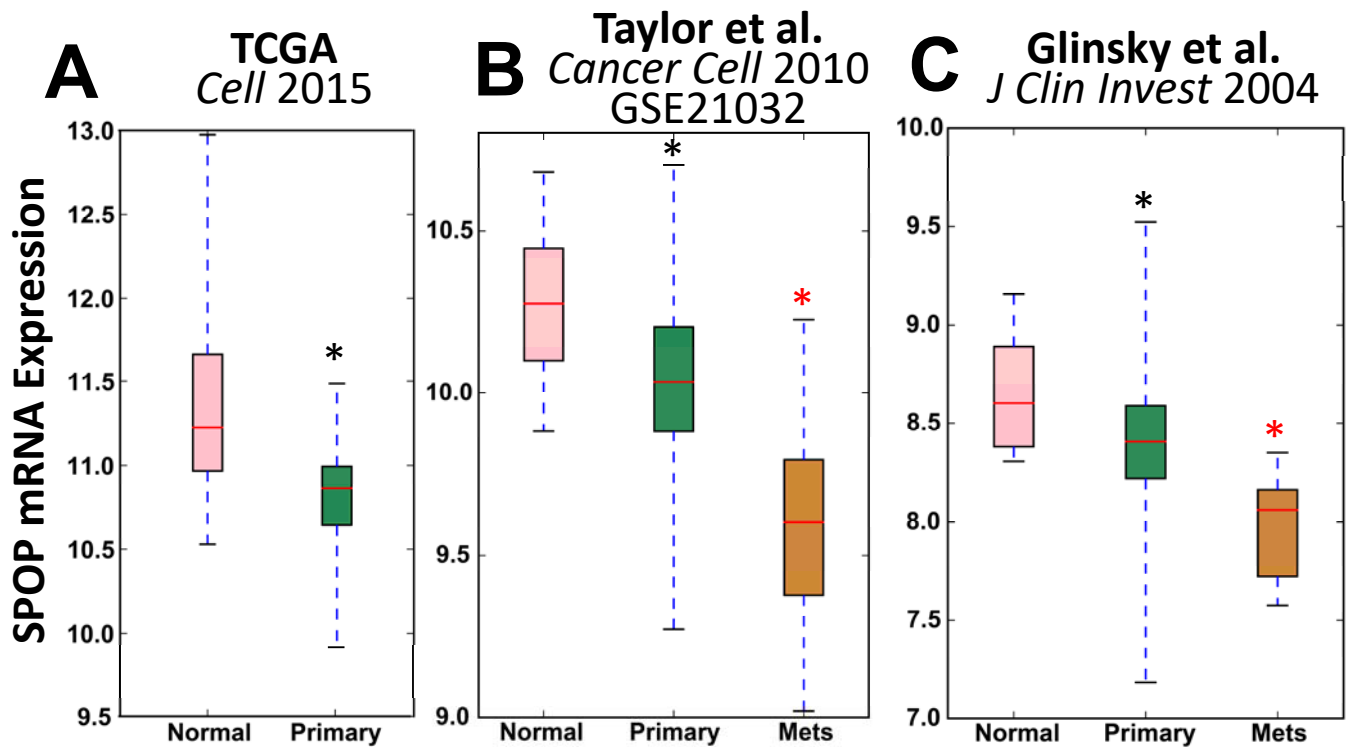

# Supplementary Figure 1

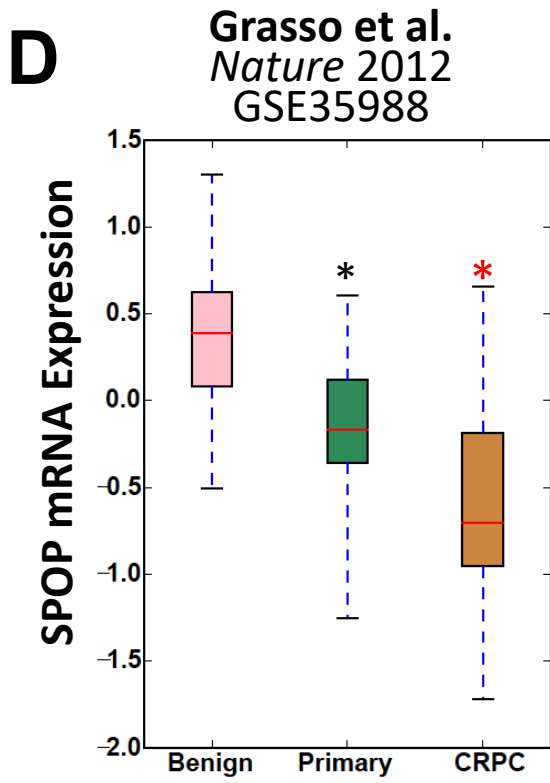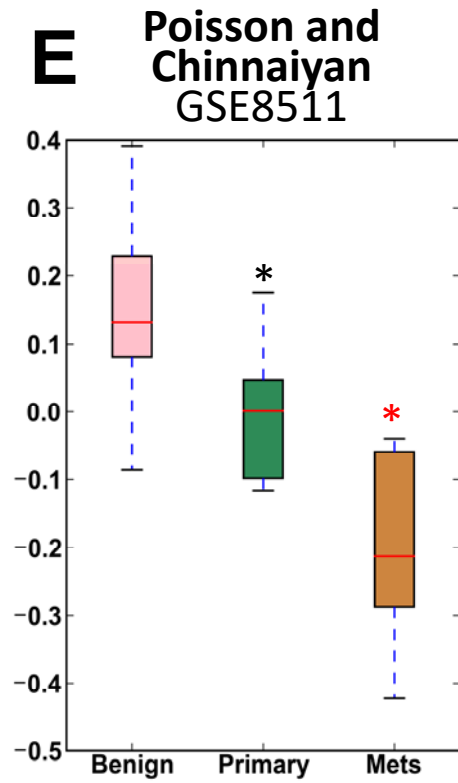

## Supplementary Figure 2

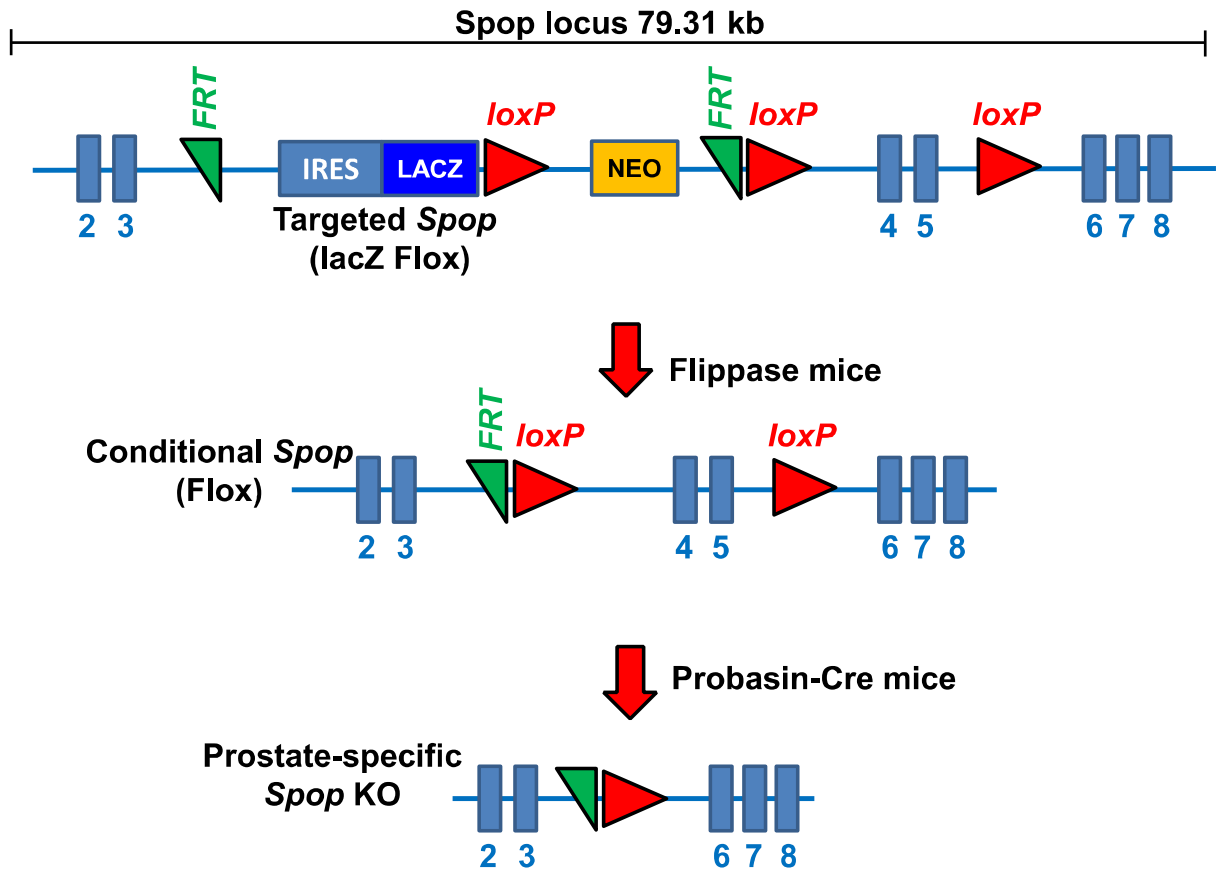

Mouse *Spop* Gene locus (NM\_025287 / uc007lak.1)

**Supplementary Figure 2: Schematic representation of the *Spop* genomic locus in a whole-body heterozygous mouse model and a prostate-specific *Spop*-ablated mouse model.** Schematic representation of the murine *Spop* genomic locus in *Spop* Knockout-First-Reporter Tagged Insertion mice (*Spop*<sup>tm1a(KOMP)Wtsi</sup>), where a cassette containing  $\beta$ -galactosidase (LacZ) and neomycin-resistance genes was engineered into the *Spop* locus (after exon 3), interrupting the expression of the full-length *Spop* and resulting in a non-expressive allele. We then crossed the *Spop*<sup>tm1a(KOMP)Wtsi</sup> mice with ROSA-Flp mice (with the Flippase gene knocked into the ROSA26 locus), in order to remove the LacZ and neomycin-resistance cassettes and generate *Spop* floxed alleles (*Spop*<sup>fl</sup>), where *Spop* exons 4 and 5 (encoding the core of the MATH domain) are flanked by loxP sites. Crossing with a probasin (PB)-Cre transgenic mouse line results in selective ablation of the *Spop* allele in the prostate luminal epithelium.

### Supplementary Figure 3

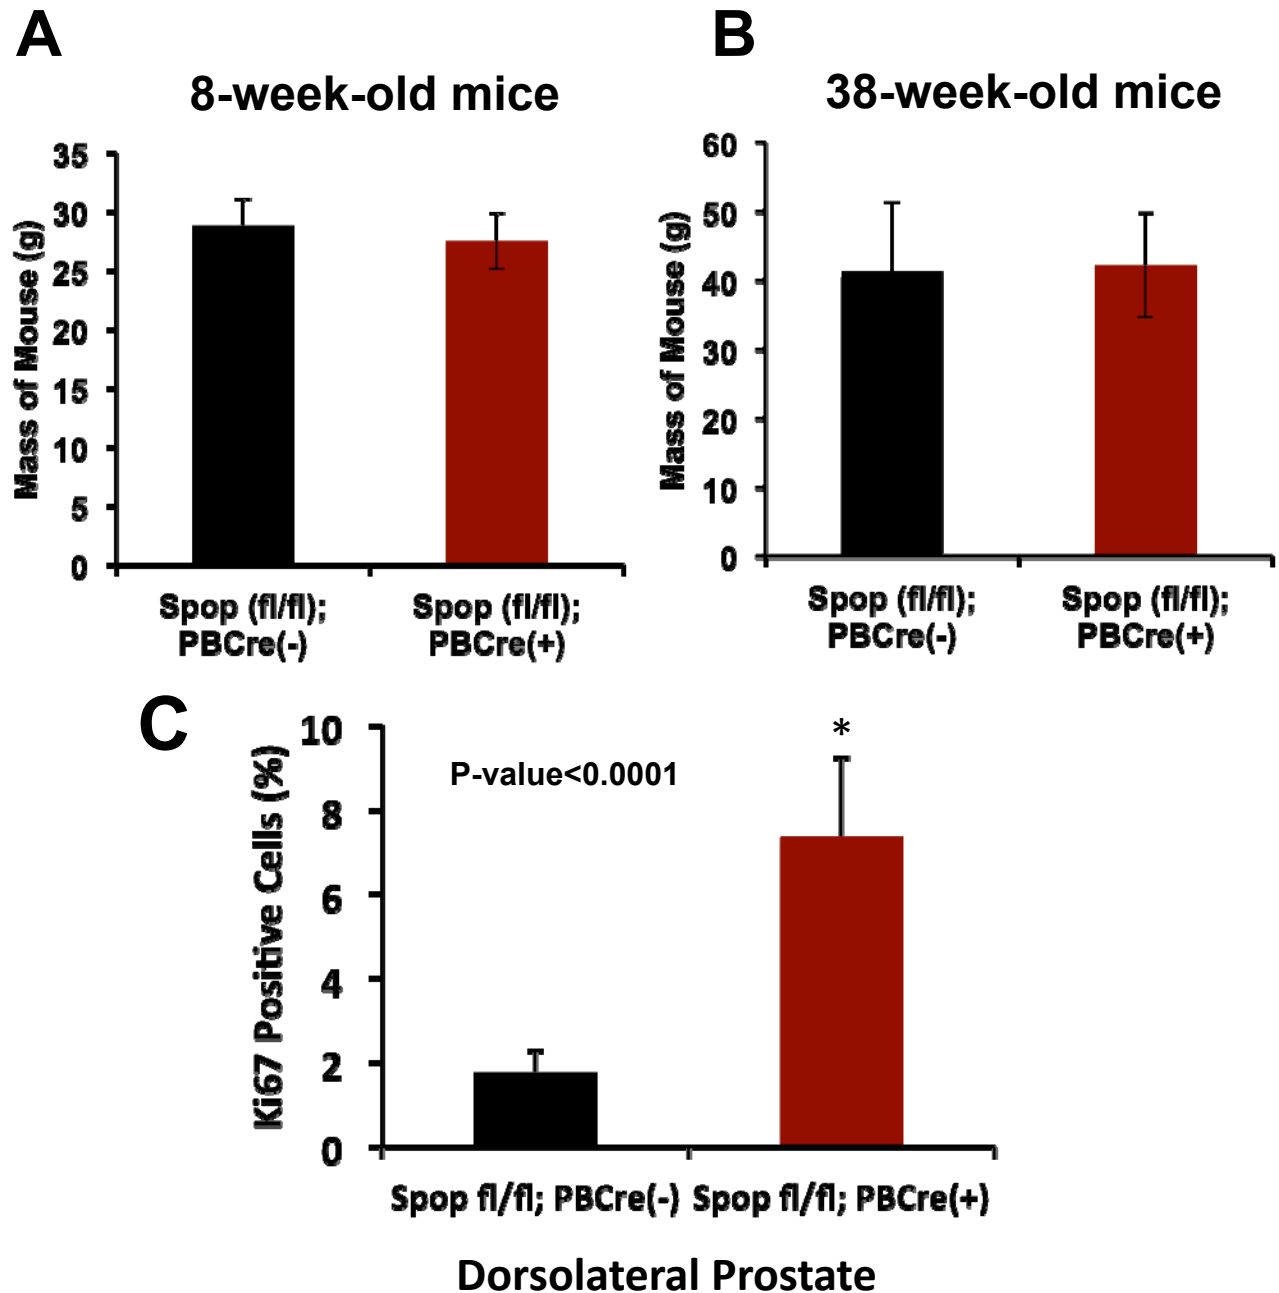

**Supplementary Figure 3: Overall body mass of mice with biallelic prostate-specific deletion of *Spop*.** **A.** Overall body mass of *Spop*<sup>fl/fl</sup>;PBCre(-) (n=13) and *Spop*<sup>fl/fl</sup>;PBCre(+) (n=10) mice (measured at 8 weeks of age) . **B.** Overall body mass of *Spop*<sup>fl/fl</sup>;PBCre(-) and *Spop*<sup>fl/fl</sup>;PBCre(+) mice (measured at 38 weeks of age). **C.** Quantification of Ki67 staining in the dorsolateral prostate lobes of 8-week-old *Spop*<sup>fl/fl</sup>;PBCre(-) (n=7) and *Spop*<sup>fl/fl</sup>;PBCre(+) (n=8) mice. Mean with SD is shown.

## Supplementary Figure 4

**Supplementary Figure 4: Prostate-specific biallelic ablation of *Spop* leads to elevated expression of AR and c-MYC proteins. A-B.** Higher magnification of c-MYC IHC of ventral and dorsolateral prostate of 8-week-old *Spop<sup>fl/fl</sup>;PBCre(-)* and *Spop<sup>fl/fl</sup>;PBCre(+)* mice. Prostate sections from 7 *Spop<sup>fl/fl</sup>;PBCre(-)* and 8 *Spop<sup>fl/fl</sup>;PBCre(+)* mice were stained with c-MYC. Four representative images are shown. **C-D.** Quantification of the protein expression changes noted in the immunoblot analyses for AR and c-MYC in the 8-week-old *Spop<sup>fl/fl</sup>;PBCre(-)* and *Spop<sup>fl/fl</sup>;PBCre(+)* mice.

**A**

***Spop* (fl/fl); PBCre(-)**

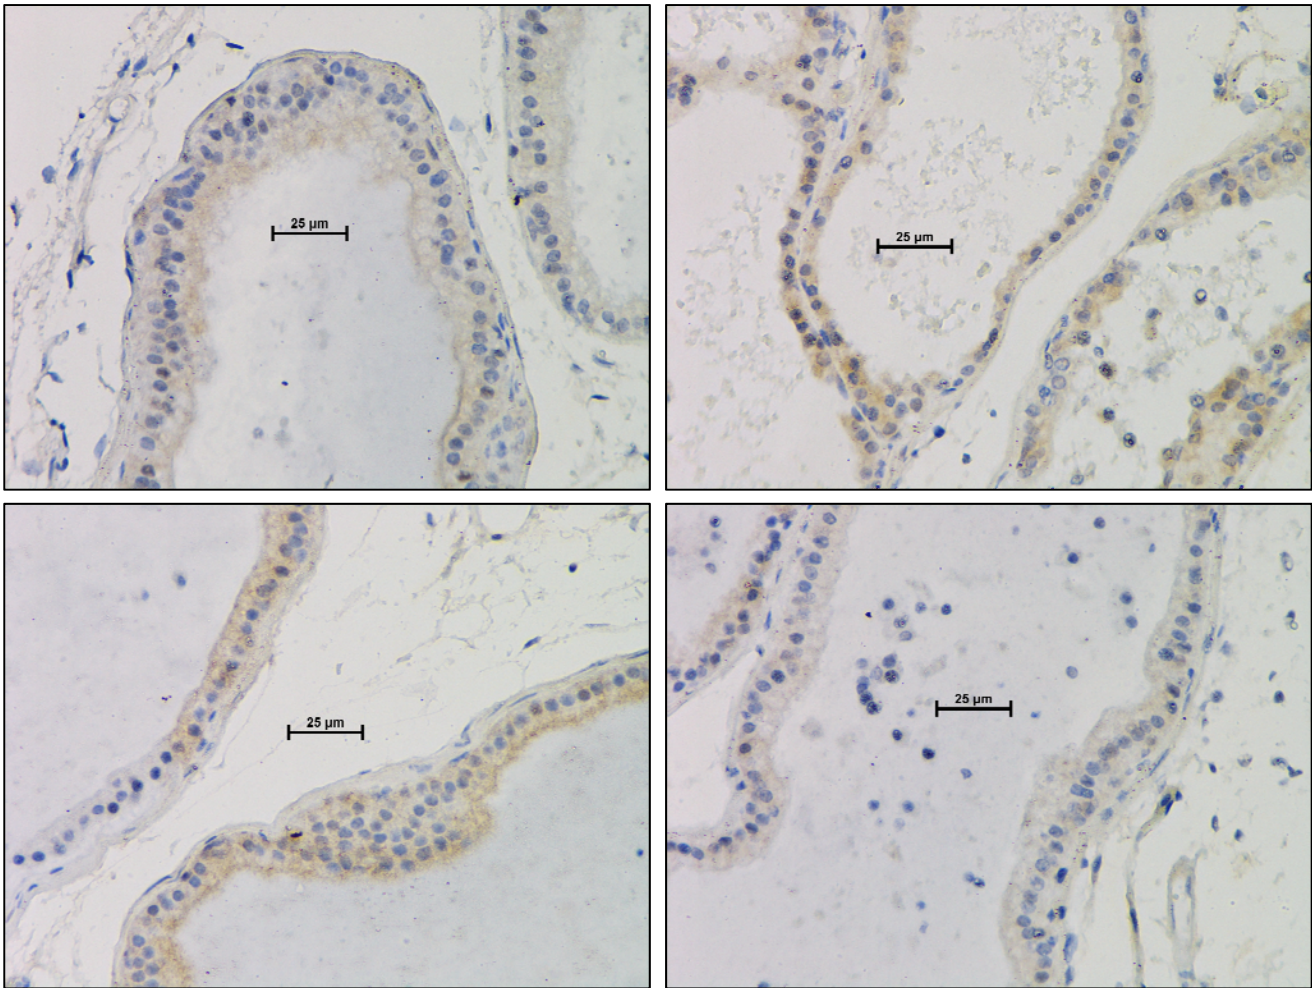

**c-MYC**

**B**

*Spop* (fl/fl); PBCre(+)

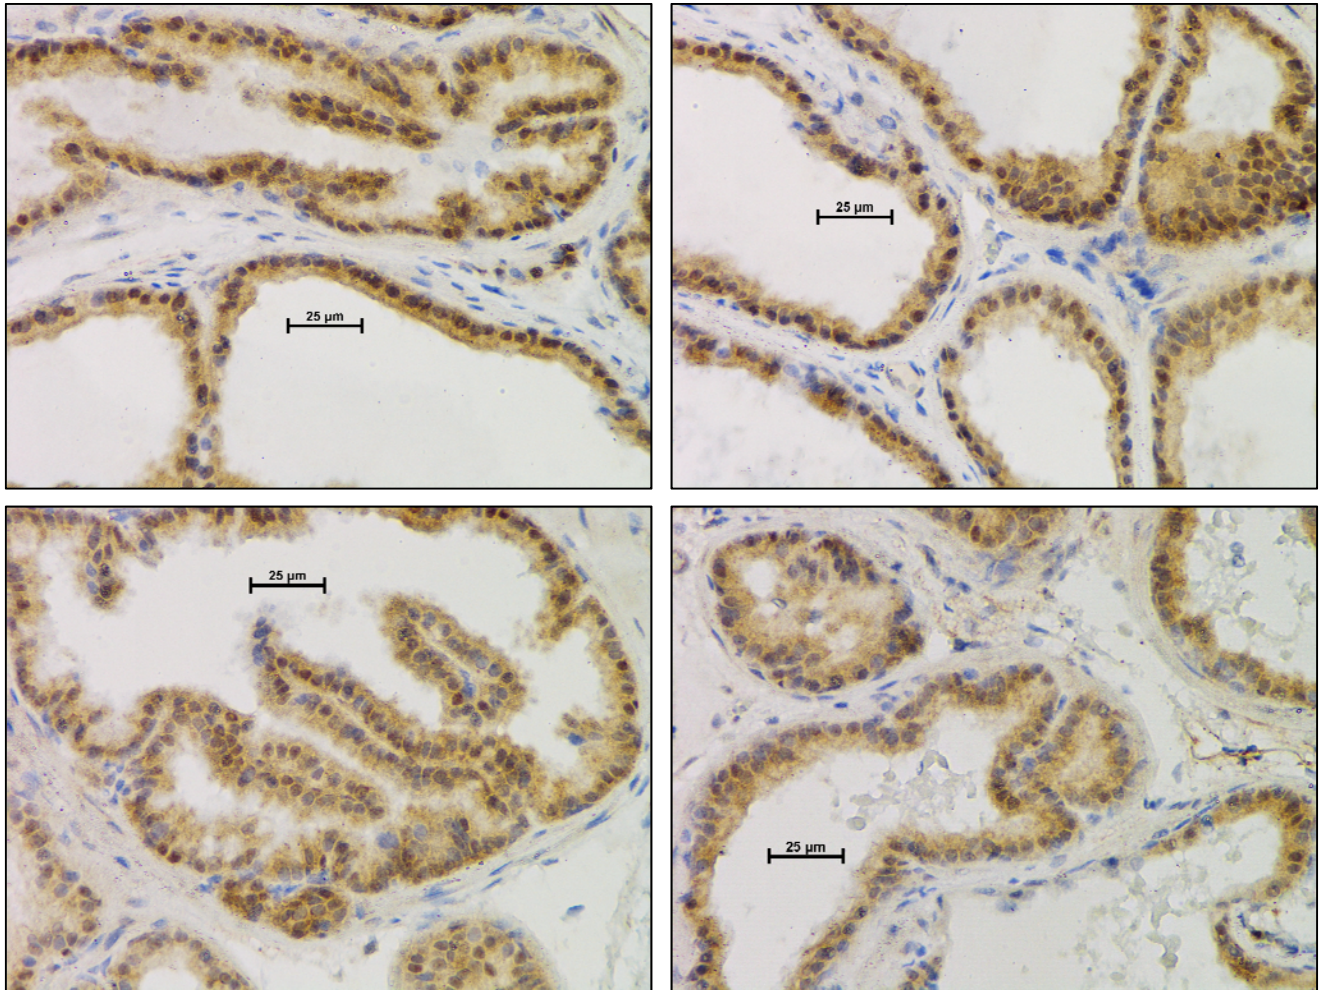

**c-MYC**

Supplementary Figure 4

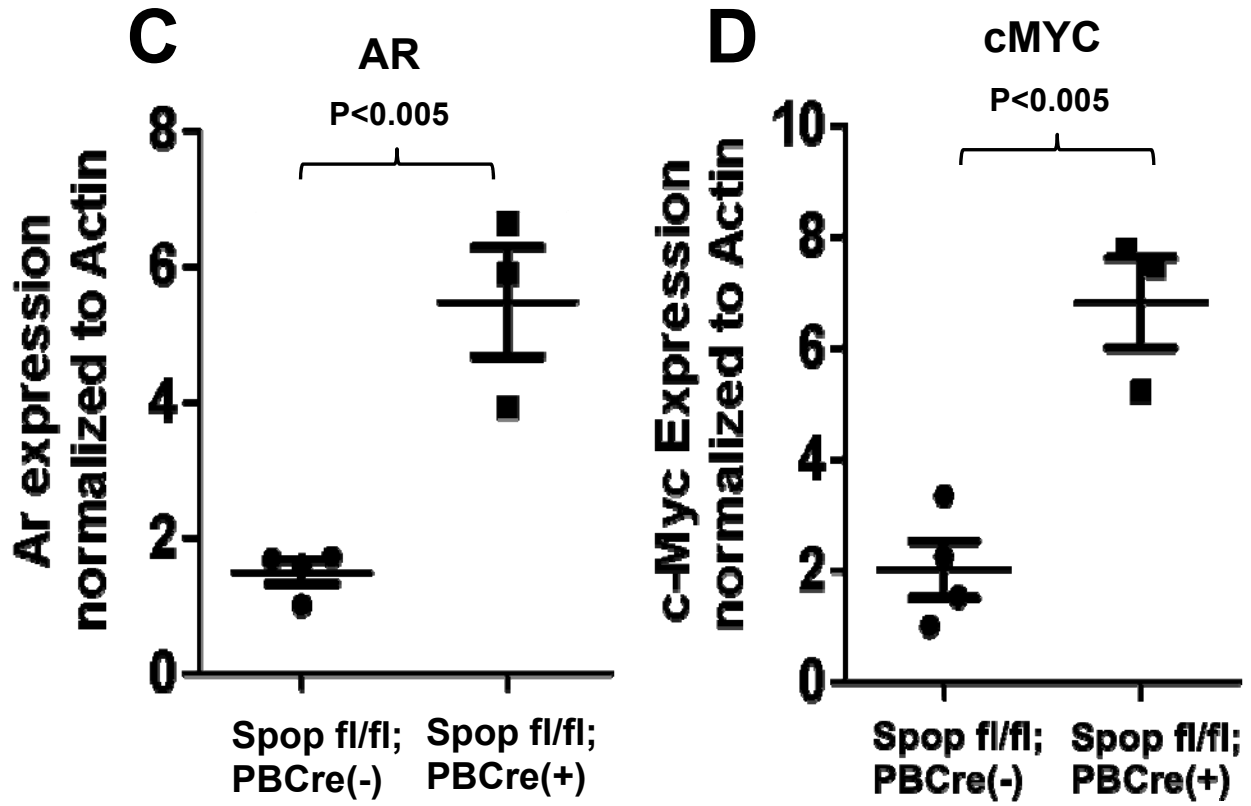

Supplement: NIHMS856828-supplement-Supp_info_2_pdf.pdf [file NIHMS856828-supplement-Supp_info_2_pdf.pdf]
