# Supplementary material
Source: PubMed Central journal article supplement (PMC5887163)
Supplement: NIHMS856828-supplement-6.pdf [file NIHMS856828-supplement-6.pdf]

## Supplemental Figure 17

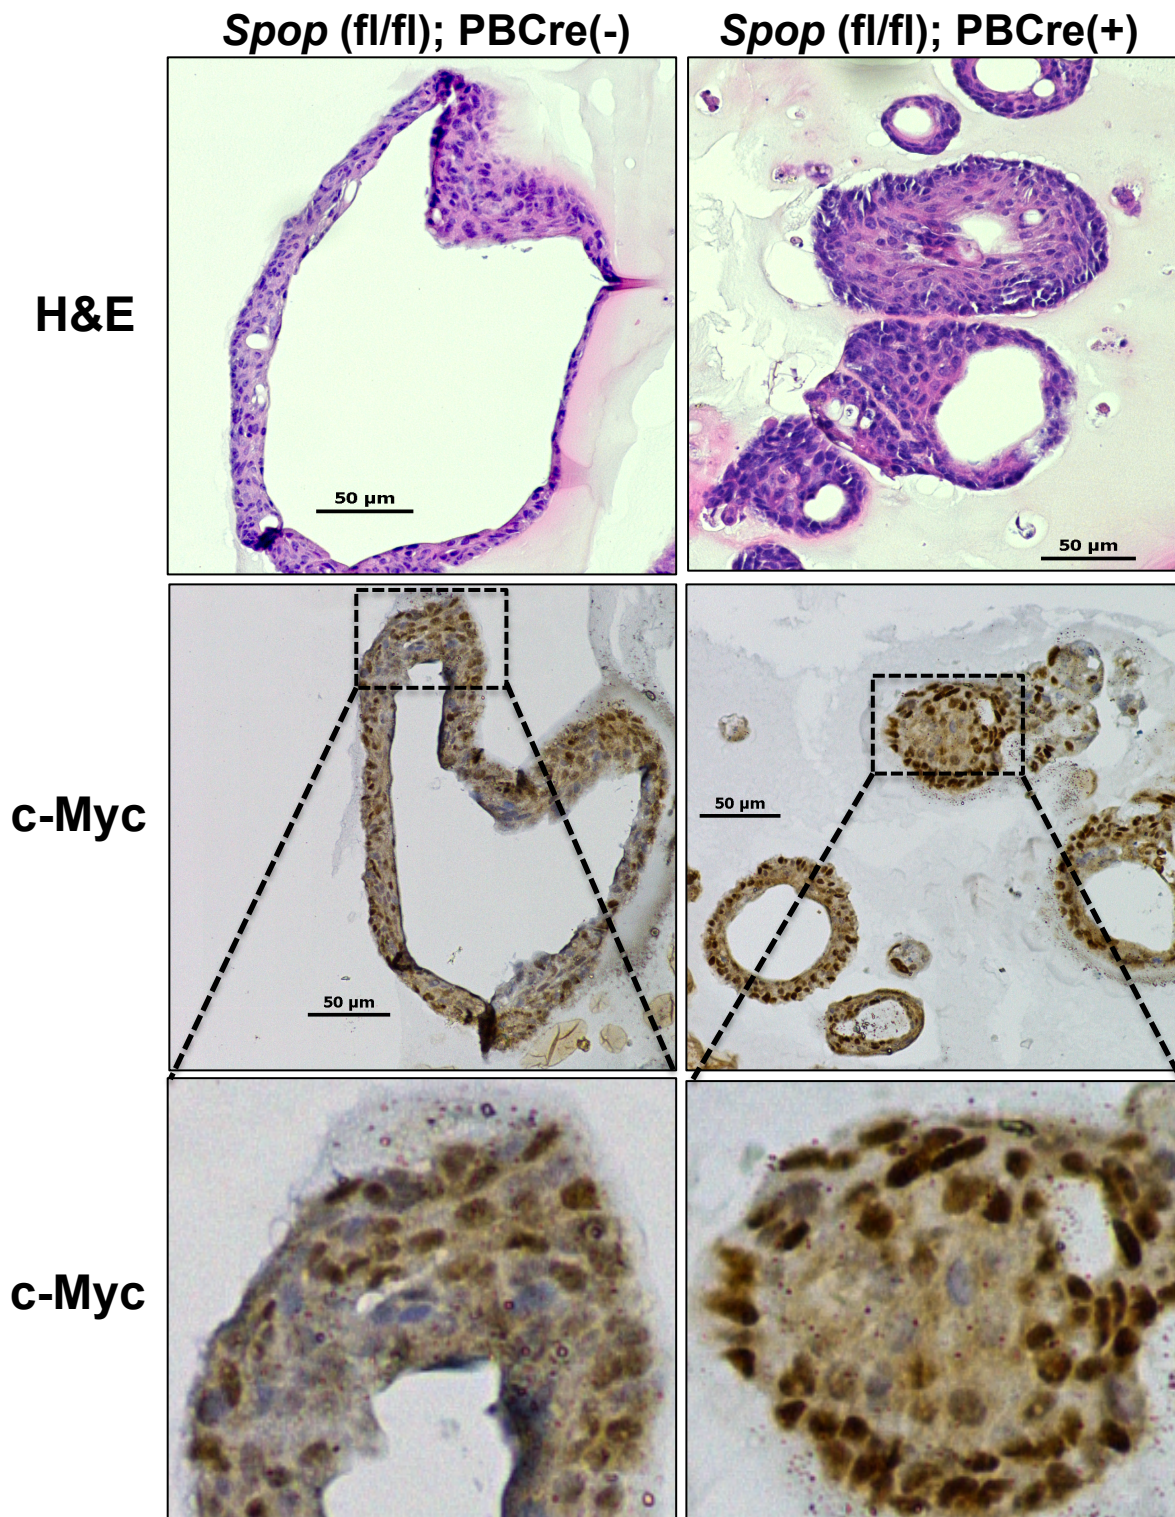

**Supplemental Figure 17: Immunohistochemical detection of c-Myc protein in prostate organoids.** Prostate cells from *Spop*<sup>fl/fl</sup>;PBCre(+) mice grown as organoids *in vitro* retain their increased c-Myc protein expression compared to cells from *Spop*<sup>fl/fl</sup>;PBCre(-) littermates.
