# Supplementary material
Source: PubMed Central journal article supplement (PMC5887163)
Supplement: NIHMS856828-supplement-Supp_info_3_pdf.pdf [file NIHMS856828-supplement-Supp_info_3_pdf.pdf]

## Supplementary Figure 5

**Supplementary Figure 5: Biallelic prostate-specific deletion of *Spop* results in luminal cell proliferation.** Immunofluorescent staining for cytokeratin-5 and cytokeratin-8 in dorsolateral prostate (DLP) and ventral prostate (VP) from 38 week-old *Spop*<sup>fl/fl</sup>;PBCre(-) (**A**) and *Spop*<sup>fl/fl</sup>;PBCre(+) mice (**B**); PIN lesions highlighted in the red squares.

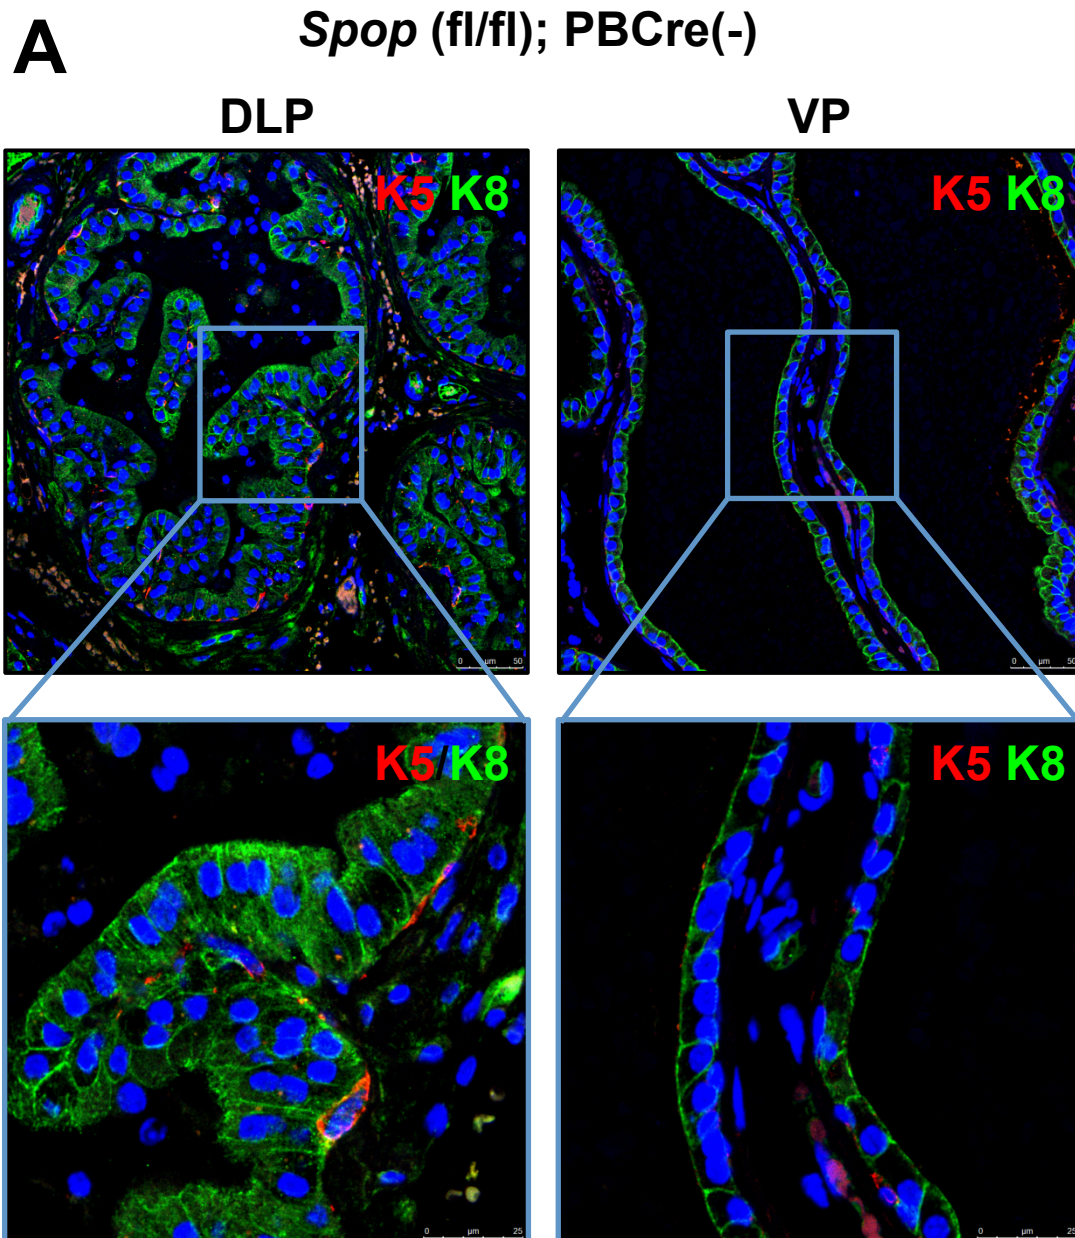

Supplementary Figure 5

**B**

*Spop* (fl/fl); PBCre(+)

DLP

VP

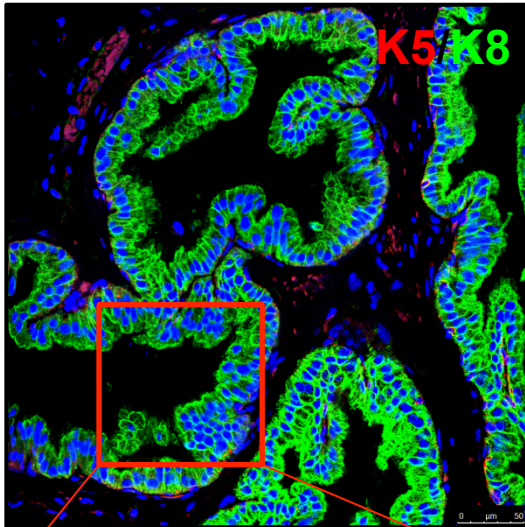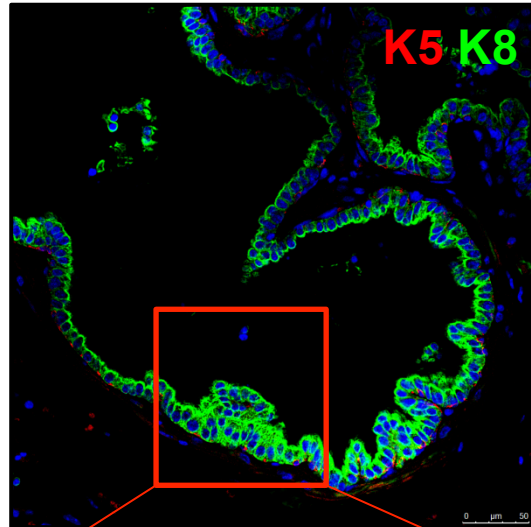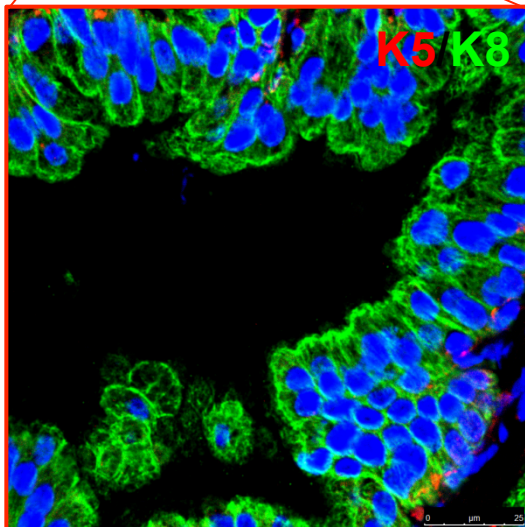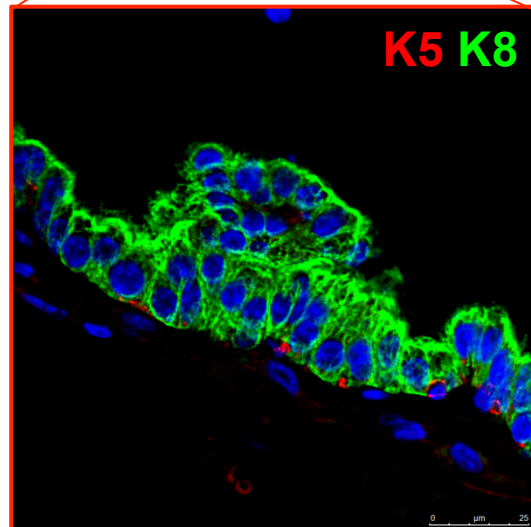

Supplementary Figure 6

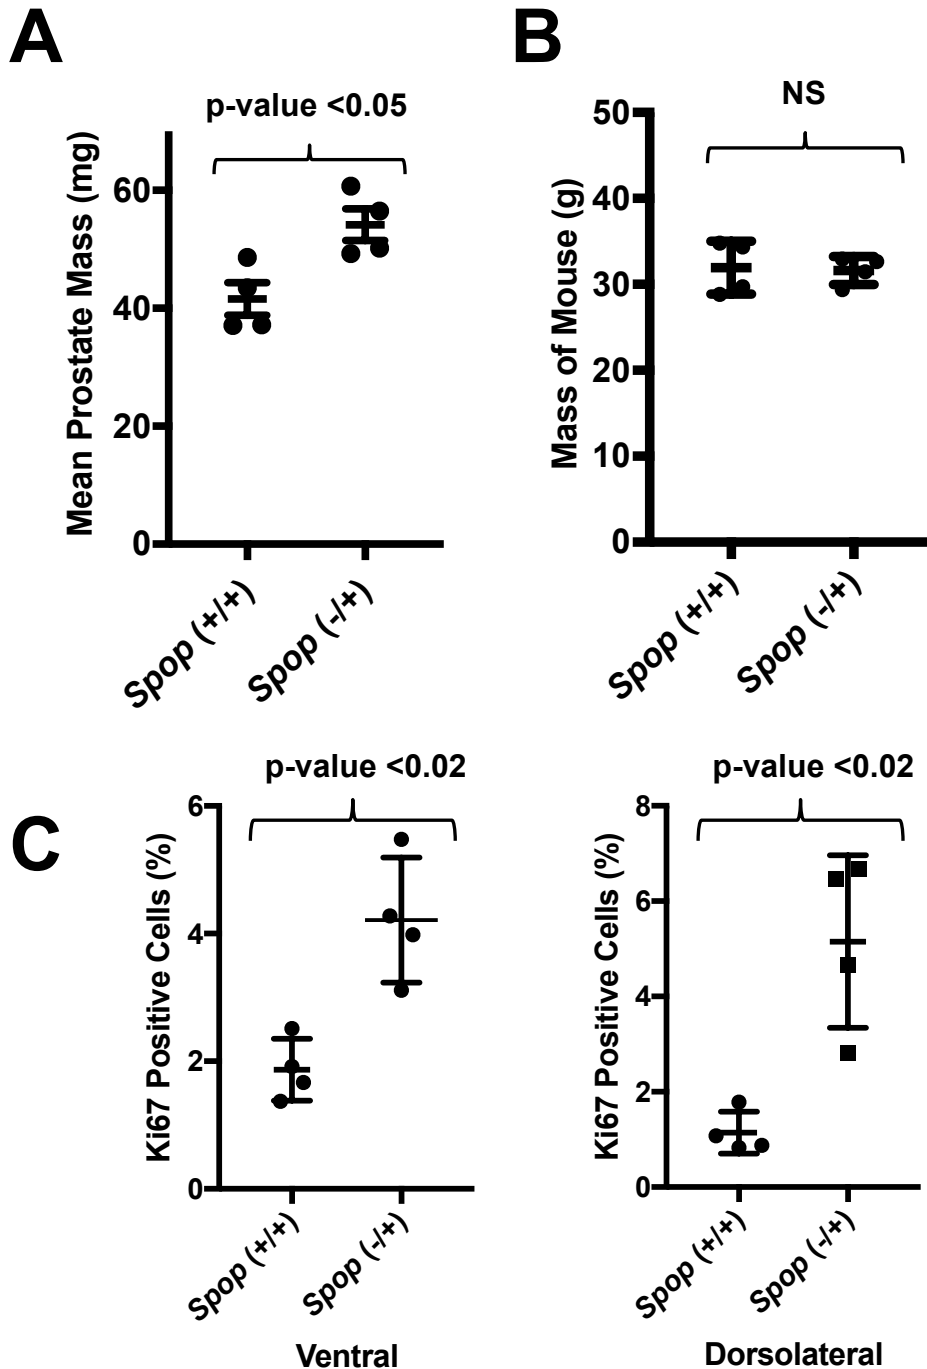

**Supplementary Figure 6: *Spop*<sup>tm1a (KOMP)Wtsi</sup> (heterozygous) mice (*Spop*<sup>+/-</sup>) exhibit increased prostate mass and higher presence of Ki67(+) cells. **A.** Prostate mass of 8 week-old *Spop*<sup>tm1a (KOMP)Wtsi</sup> (abbreviated as *Spop*<sup>+/-</sup>) and wild-type C57BL/6 mice. **B.** Overall body mass of wild-type and *Spop* hemizygous (*Spop*<sup>tm1a(KOMP)Wtsi</sup>, also abbreviated as *Spop*<sup>+/-</sup>) male mice (measured at 8 weeks of age). **C.** % Ki67(+) cells in the ventral and dorsolateral prostate lobes of 8-week-old *Spop*<sup>tm1a (KOMP)Wtsi</sup> and wild-type C57BL/6 mice. Mean (n=4) with SD is shown.**
