# Supplementary material
Source: PubMed Central journal article supplement (PMC5887163)

## Supplementary Figure 7

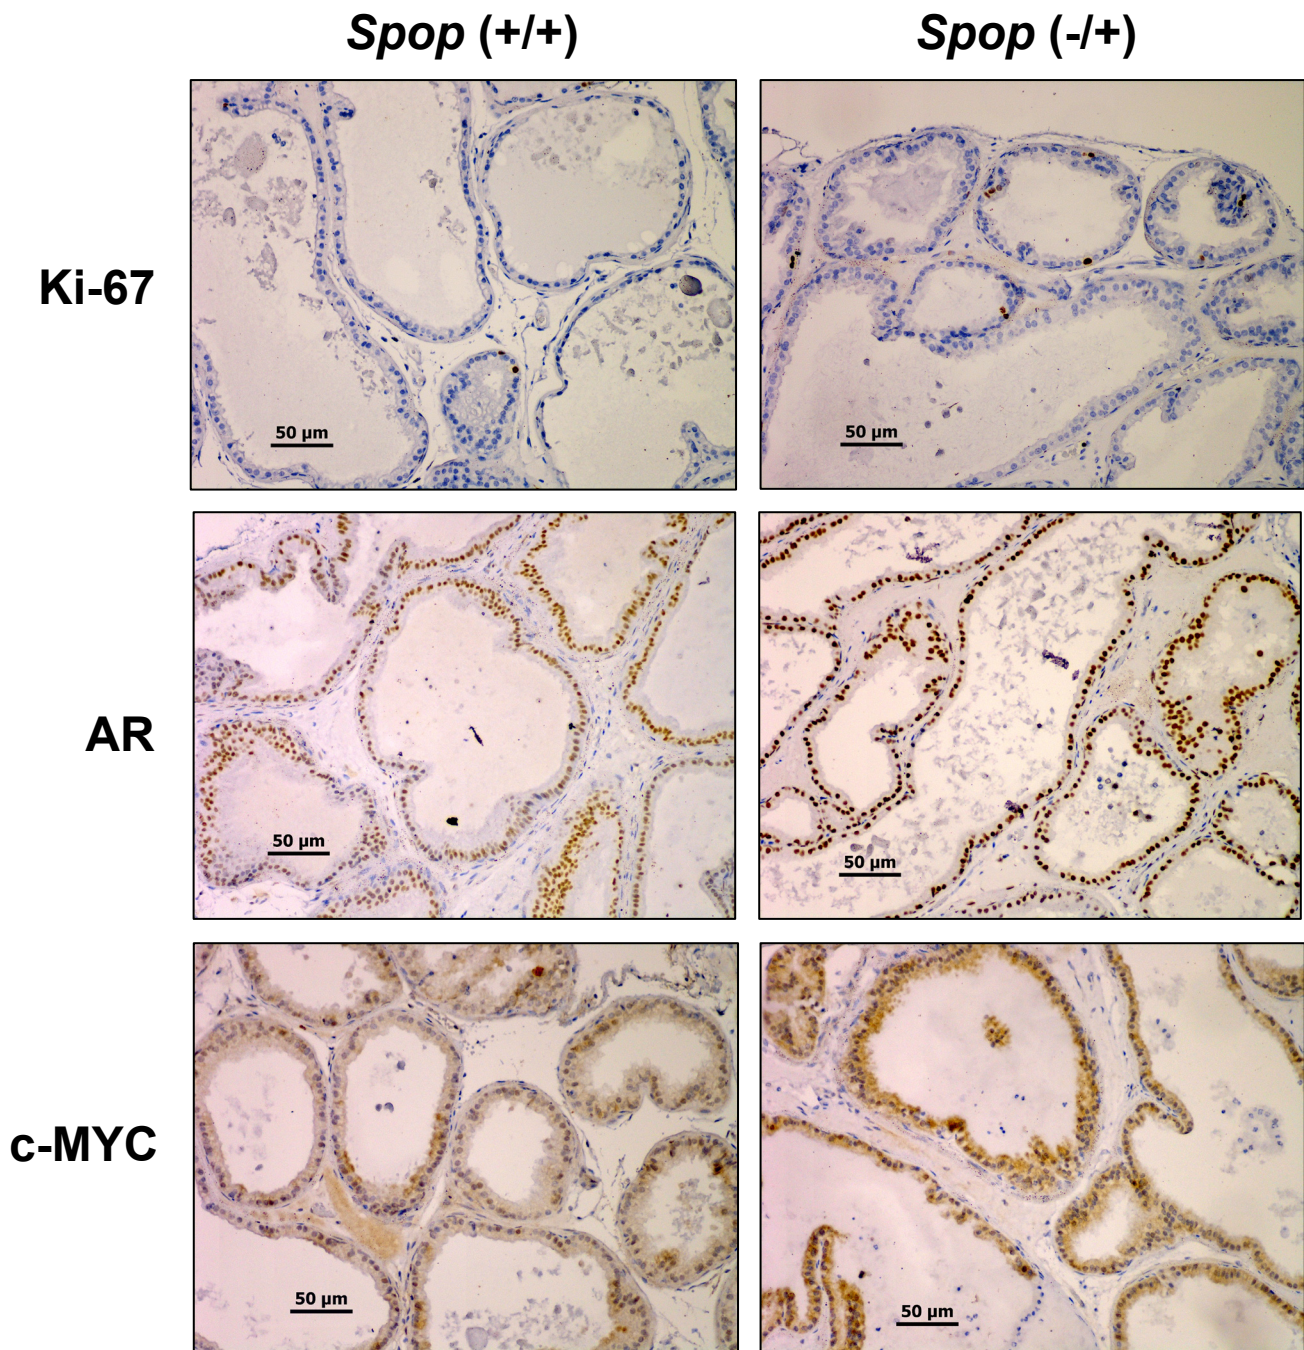

**Supplementary Figure 7: *Spop*<sup>+/-</sup> mice exhibit increased AR and c-MYC protein levels compared to *Spop* wild-type mice.** Representative immunohistochemical staining for Ki67, AR, and c-MYC expression in the prostates of 8 week-old wild-type C57BL/6 and *Spop*<sup>tm1a (KOMP)Wtsi</sup> (*Spop*<sup>+/-</sup>) mice (n=4).

## Supplementary Figure 8

**Supplementary Figure 8: Biallelic ablation of *Spop* results in increased presence of TUNEL-positive cells. (A) Representative TUNEL staining of prostate tissue from 8-week-old *Spop*<sup>fl/fl</sup>;*PBCre*(-) and *Spop*<sup>fl/fl</sup>;*PBCre*(+) mice. (B) Quantification of TUNEL-positive nuclei in prostates of 8-week-old *Spop*<sup>fl/fl</sup>;*PBCre*(-) (n=7) and *Spop*<sup>fl/fl</sup>;*PBCre*(+) (n=8) mice. Mean with SD is shown.**

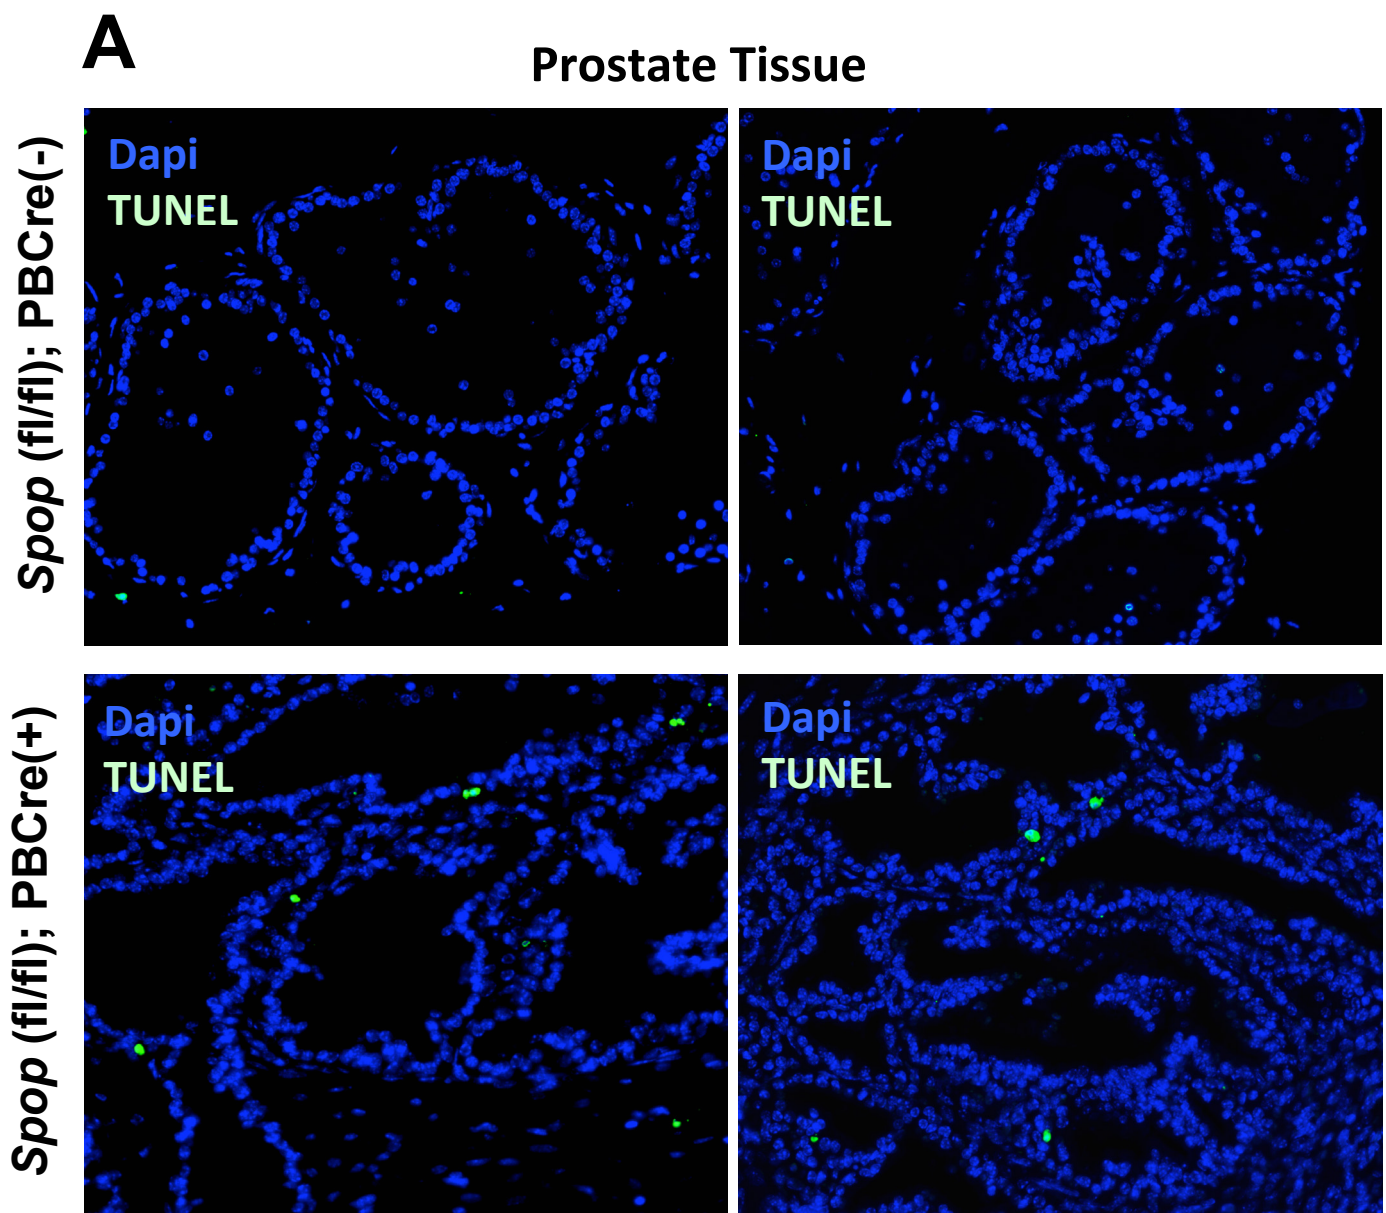

**B**

**Prostate Tissue  
From 8-week-old mice**

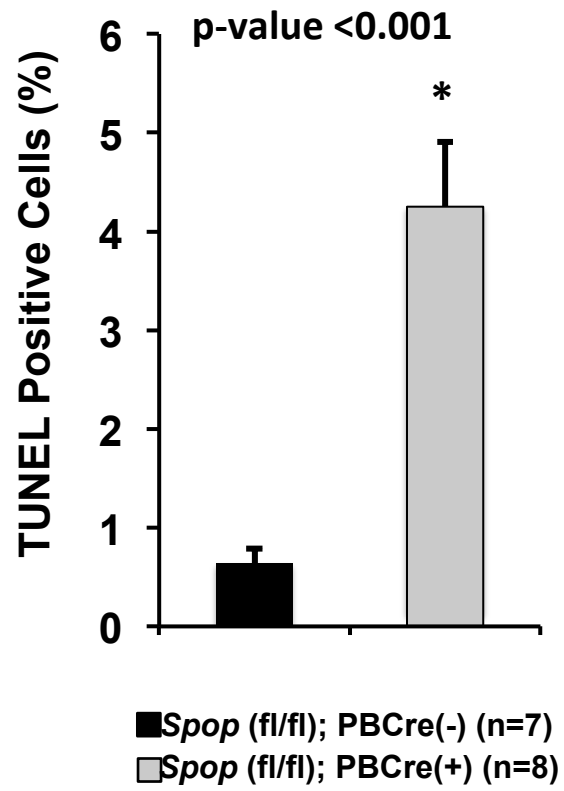



## Supplementary Figure 9

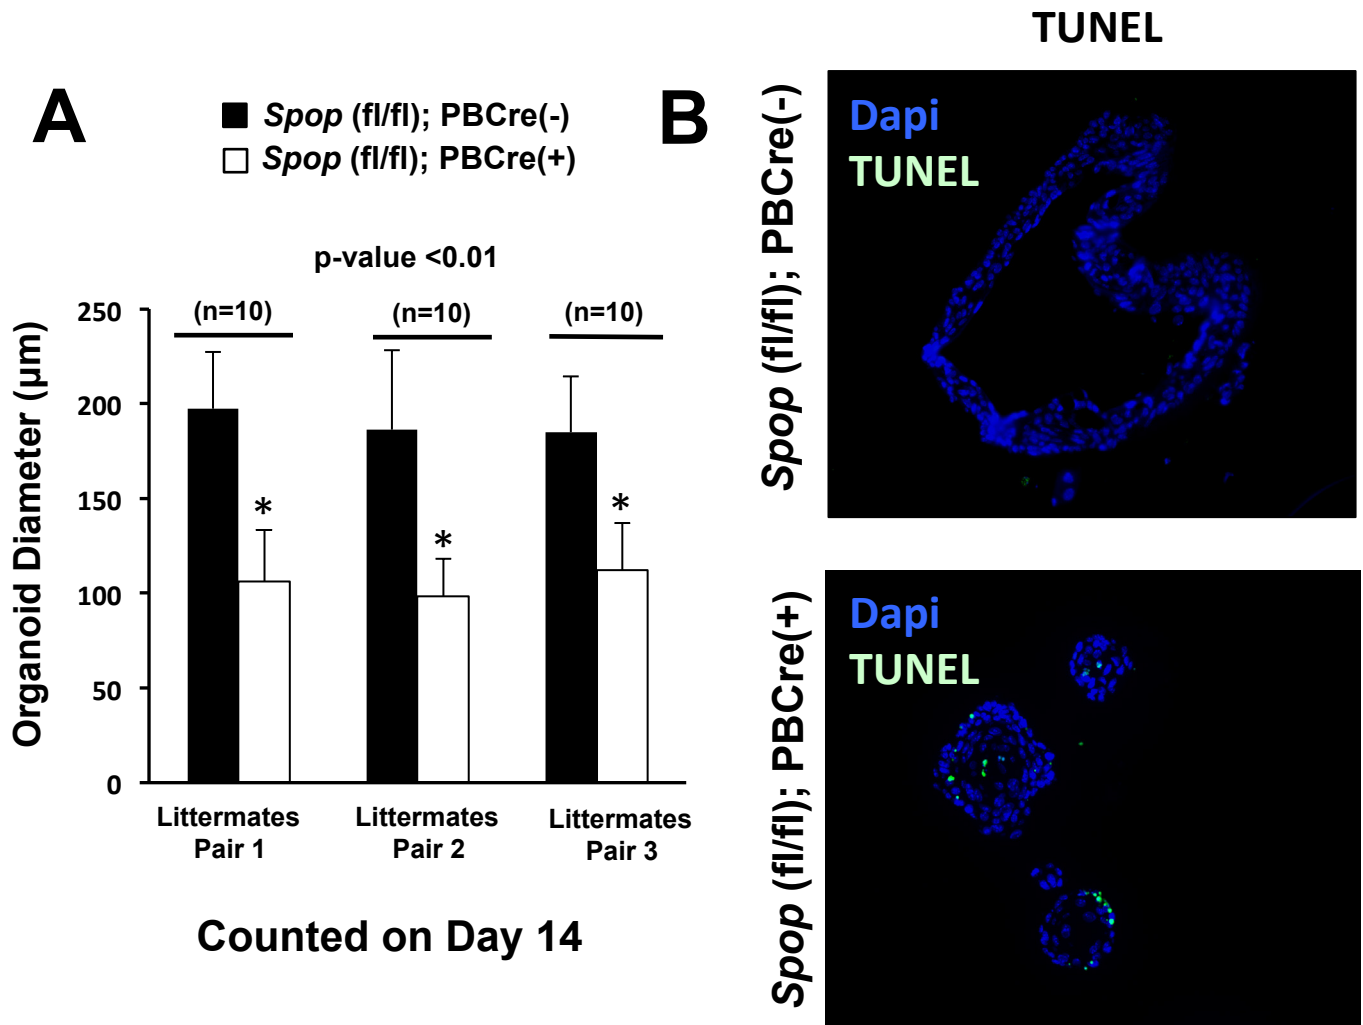

**Supplementary Figure 9: Organoids generated from *Spop* knockout mice are smaller in size than WT controls. (A)** Diameter of organoids generated from whole prostate of 8-week-old *Spop*<sup>fl/fl</sup>;PBCre(-) and *Spop*<sup>fl/fl</sup>;PBCre(+) mice. Data is shown from three independent experiments. **(B)** Representative TUNEL staining of organoids.

## Supplementary Figure 10

**Supplementary Figure 10: Cre-recombinase IHC staining in *Spop* knockout prostate tissues.** Shown here are representative Cre-IHC images of ventral prostate lobes isolated from *Spop*<sup>fl/fl</sup>;PBCre(-) (n=7), *Spop*<sup>fl/fl</sup>;PBCre(+) (n=8), and *Spop*<sup>WT</sup>;PBCre(+) (n=2) mice at the indicated age. Dorsolateral prostate lobes exhibited the same IHC pattern. (Cell signaling, Rabbit mAb #15036, 1:100 dilution).

# Supplementary Figure 10

## Immunohistochemical Analysis of Cre Recombinase

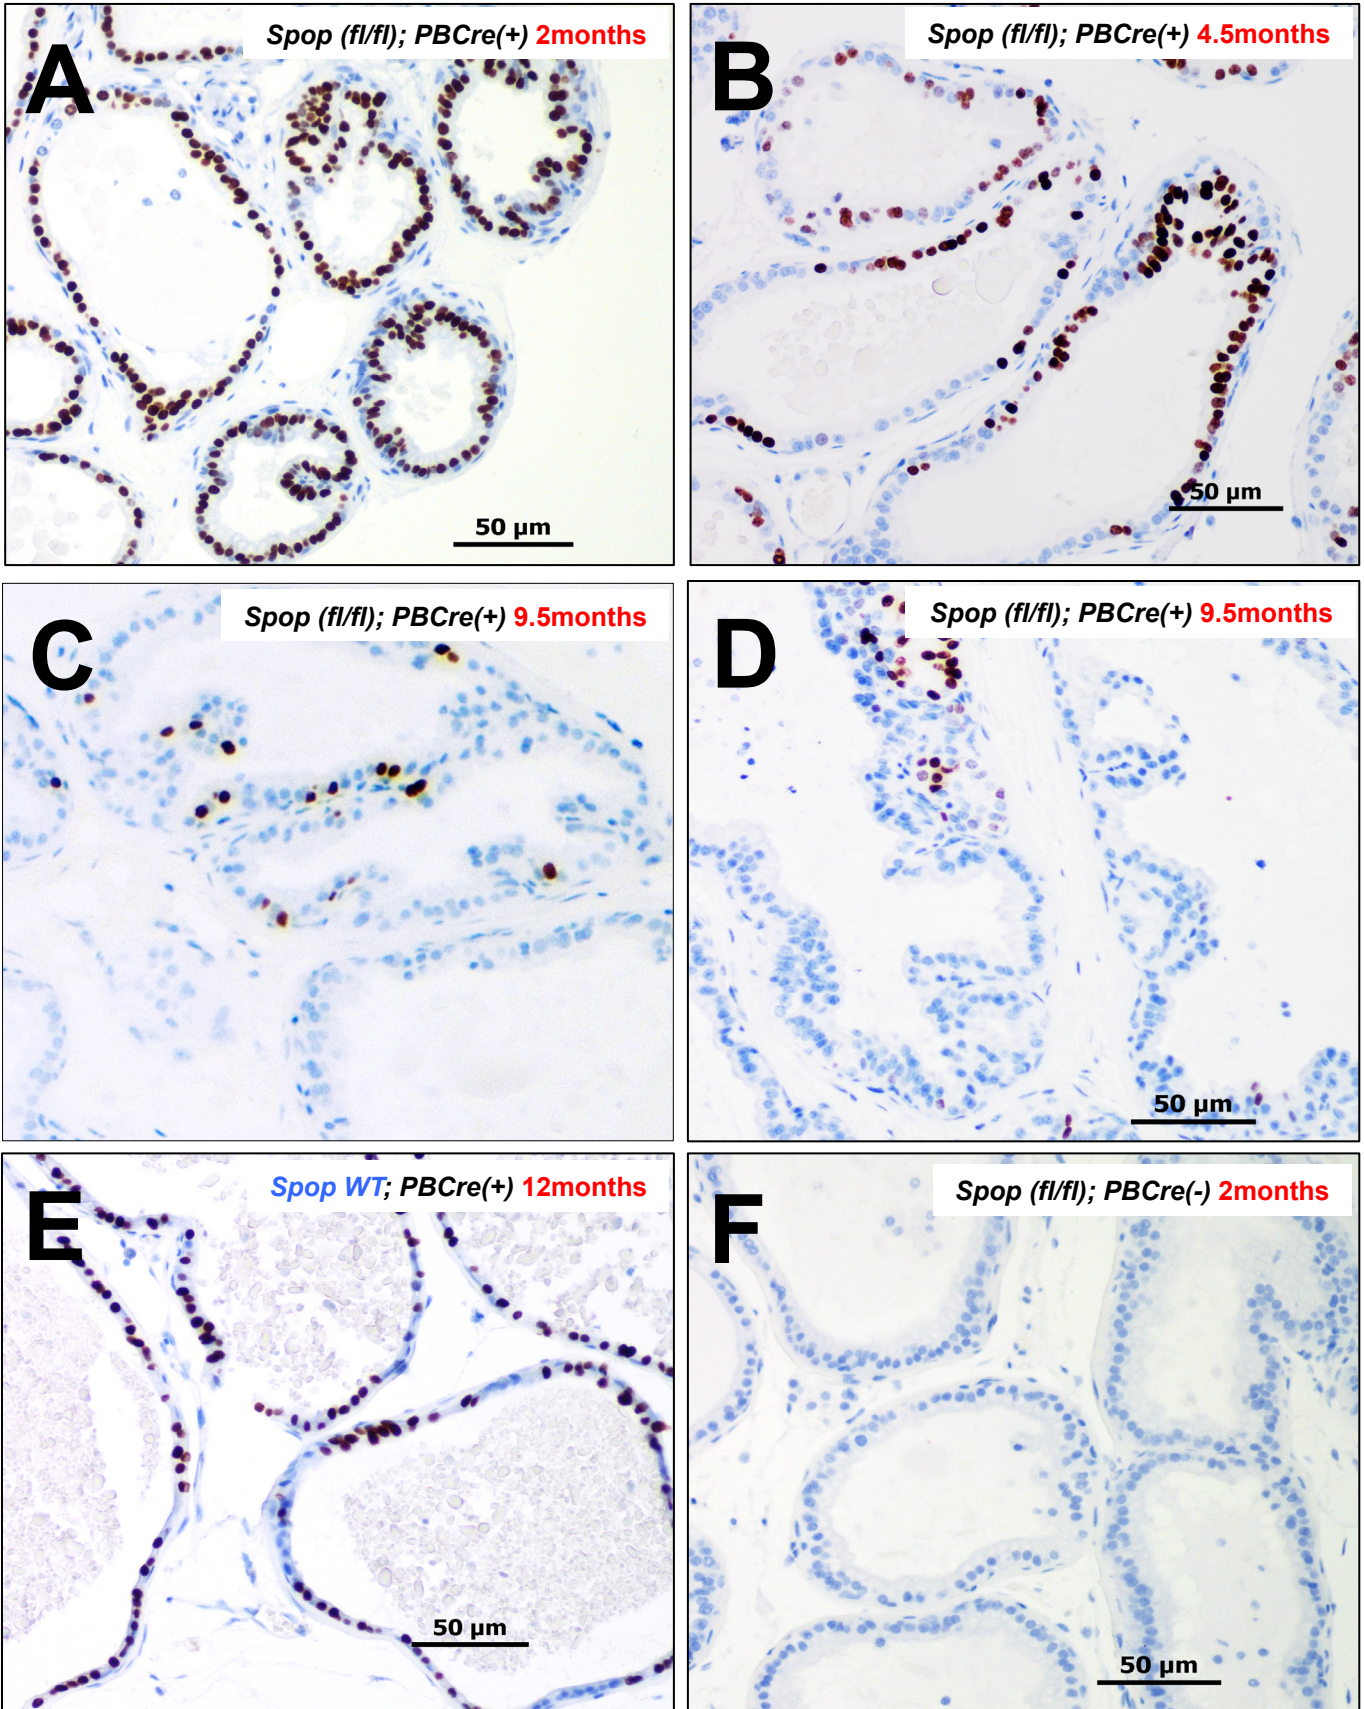

Supplement: NIHMS856828-supplement-Supp_info_4_pdf.pdf [file NIHMS856828-supplement-Supp_info_4_pdf.pdf]
